# Supplementary material for: Nuevos datos sobre la estratigrafía de subsuelo del acuífero de Torrevieja (Alicante): implicaciones en el modelo conceptual de funcionamiento.
Source: Royal Society of Chemistry journal article supplement (doi:10.1039/d1ra09441f), 2004-01-01
Supplement: d1ra09441f1.pdf [file d1ra09441f1.pdf]

## **Supplementary data**

### **Enhanced photocatalytic activity of TiO<sub>2</sub>/UiO-67 under visible-light for Aflatoxin B1 degradation**

Jia Zhang <sup>a</sup>, Xintong Gao <sup>b</sup>, Wenbo Guo <sup>b</sup>, Zengnan Wu <sup>b</sup>, Yilin Yin <sup>b</sup> and Zenghe Li <sup>\*a</sup>

College of Chemistry, Beijing University of Chemical Technology, Beijing, 100029, PR China.

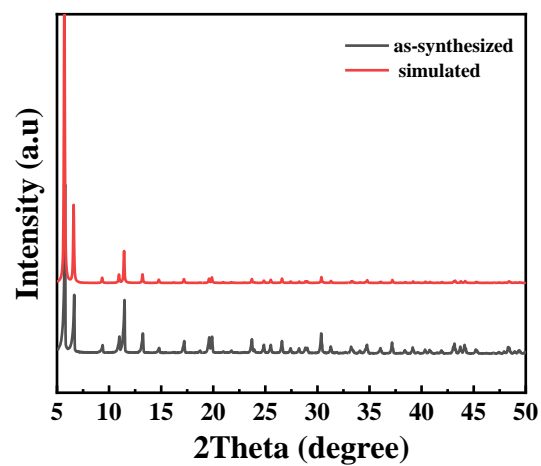

Fig. S1 XRD patterns for synthesized UiO-67, simulated pattern from crystal structure data.

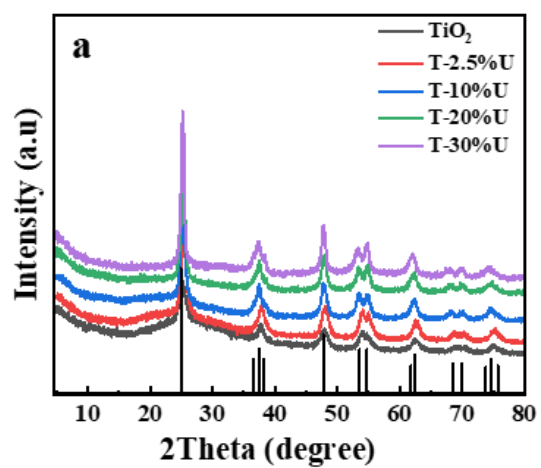

Fig. S2 XRD patterns for (a) T-XU nanoparticles (X= 2.5%, 10%, 20%, 30%), synthesized TiO<sub>2</sub> and simulated pattern for TiO<sub>2</sub>.

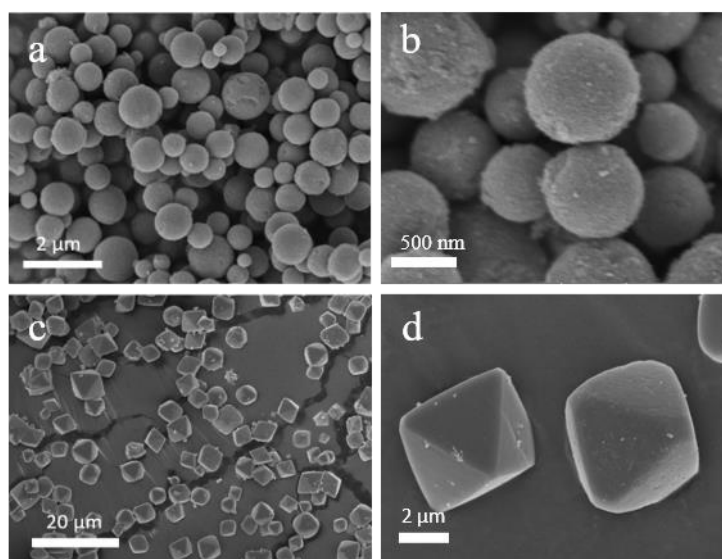

**Fig. S3** SEM images of (a-b) TiO<sub>2</sub> nanoparticles and (c-d) UiO-67 at different magnifications.

The XRD pattern of the as-synthesised UiO-67 was shown in Fig. S1, and the peaks appeared at the  $2\theta$  of  $5.6^\circ$ ,  $6.5^\circ$ ,  $11.2^\circ$ , and  $17.2^\circ$  are entirely consistent with the typical crystal structure of UiO-67, suggesting the successful synthesis of pure UiO-67. In addition, the crystal morphology of UiO-67 and TiO<sub>2</sub> was characterized by SEM. TiO<sub>2</sub> nanospheres exhibit perfect sphere morphology and smooth surface and particle size range from 0.5 to 1  $\mu\text{m}$ . The octahedral nanocrystals of UiO-67 are clearly displayed, and individual microcrystals with edge lengths are around 2 - 5  $\mu\text{m}$  in Fig. S3 (c-d). Interestingly, with the doping of UiO-67, the morphology of TiO<sub>2</sub> transferred from nanospheres.

In this study, all vessels contaminated by AFB1 should be soaked in sodium hypochlorite solution (2% w/v) for 24 h and then washed with ethanol.

The experiment of XRD patterns taken from  $2\theta = 5^\circ$  onwards instead of  $20^\circ$  was added, and the result is shown in Fig. S2. However, no obvious peaks of UiO-67 were observed in pattern of the T-XU, including T-30%U (30% was the mass ratio of UiO-67 with respect to the tetrabutyl titanate). The result of XRD indicated that the T-XU composites were mainly composed by TiO<sub>2</sub> and negligible doping amount of UiO-67.

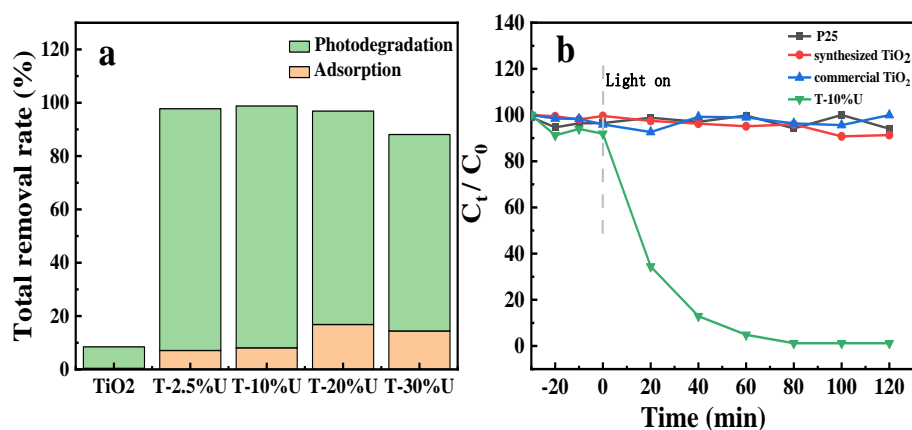

**Fig. S4** (a) Total removal rate of TiO<sub>2</sub>, T-XU. (b) Photocatalytic degradation of AFB1 over T-10%U, commercial TiO<sub>2</sub>, synthesized TiO<sub>2</sub>, the commercial P25 under visible light irradiation.

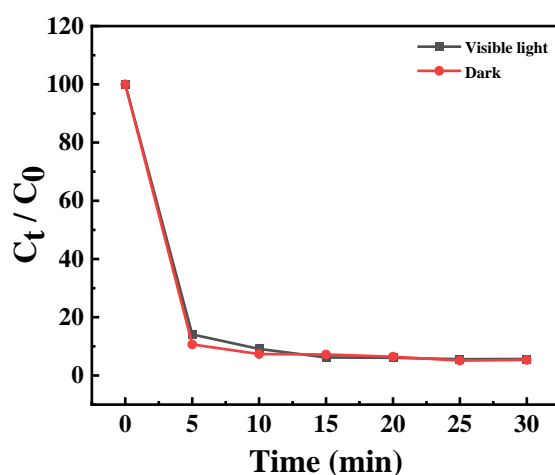

**Fig. S5** photodegradation of AFB1 over UiO-67 with/without visible light.

Table. S1 Photodegradation rate of AFB1 over UiO-67 with/without visible light.

|               | 5 min  | 10 min | 15 min | 20 min | 25 min | 30 min |
|---------------|--------|--------|--------|--------|--------|--------|
| Dark          | 85.90% | 90.87% | 93.8%  | 93.93% | 94.38% | 94.33% |
| Visible light | 89.32% | 92.63% | 92.79% | 93.57% | 94.89% | 94.64% |

As shown in Fig. S5 and Table S1, the photodegradation rate of UiO-67 is similar to the adsorption percentages in dark condition. After 30 min, the removal rate of AFB1 in dark conditions reached 94.33%, while the photodegradation rate just reached 94.67%. Thus, we concluded that UiO-67 has high adsorption efficiency and poor photodegradation efficiency under visible light.

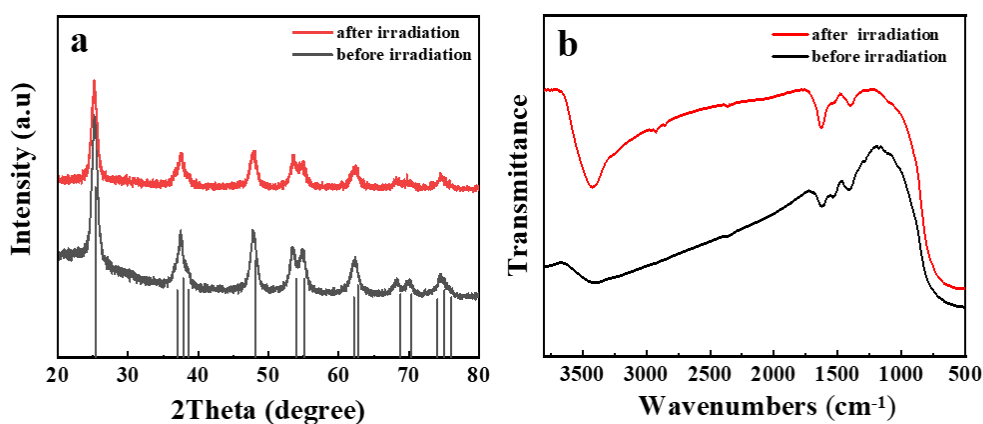

Fig. S6 (a) XRD patterns and (b) FT-IR spectra of T-10%U before and after irradiation for 4 cycle reaction.

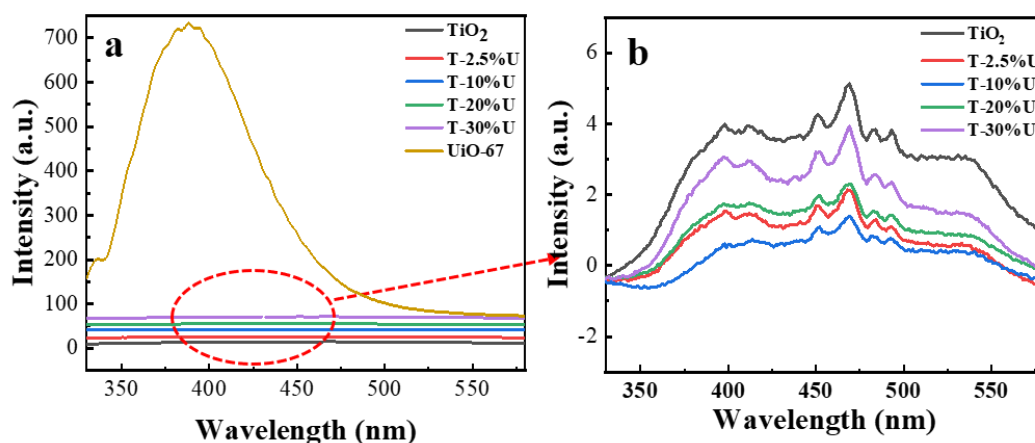

Fig. S7 (a) PL spectra of T-XU nanoparticles, TiO<sub>2</sub> and UiO-67. (b) PL spectra of T-XU nanoparticles and TiO<sub>2</sub>.

The PL spectra of UiO-67 have been added. As shown in Fig. S7, UiO-67 possessed high fluorescent intensity compared with T-XU and TiO<sub>2</sub>. In fact, UiO-67 is a fluorescent MOF according to a previous report,<sup>1</sup> while traditional semiconductors have low fluorescence intensity. PL spectra were usually used to evaluate the recombination rate of traditional semiconductors photocarriers. Therefore, The PL spectra of UiO-67 have been added in supporting information.

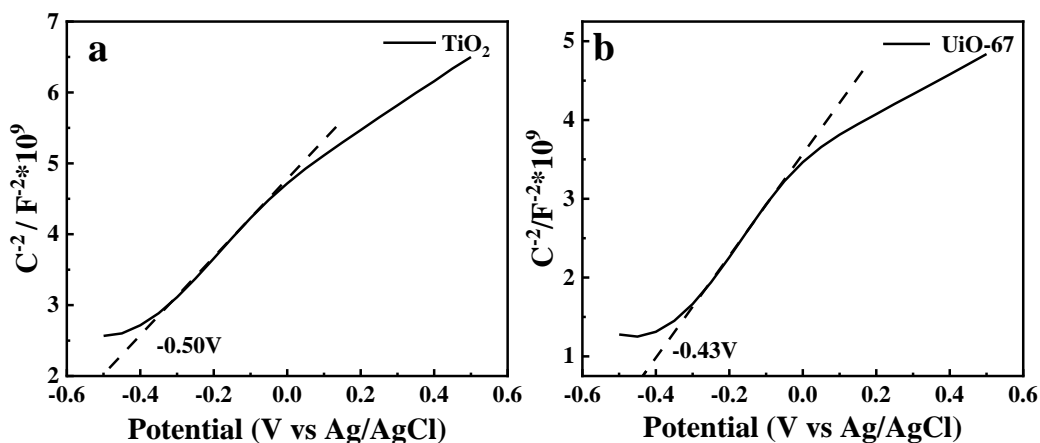

Fig. S8 Mott-Schottky plots for TiO<sub>2</sub> (a) and UiO-67 (b).

Table. S2 Pseudo 1st order model parameters for the degradation of AFB1 onto T-XU composites.

|                        | T-2.5%U | T-10%U  | T-20%U  | T-30%U  |
|------------------------|---------|---------|---------|---------|
| k/min <sup>-1</sup>    | 0.02808 | 0.05306 | 0.02799 | 0.01625 |
| t <sub>1/2</sub> (min) | 24.68   | 13.06   | 24.76   | 42.66   |
| 线性回归系数 R <sup>2</sup>  | 0.9626  | 0.9922  | 0.9927  | 0.9953  |

Table. S3 Comparison of AFB1 photodegradation of various reported photocatalysts.

| Catalyst                                                       | Light source                | The amount of catalyst (mg) | AFB <sub>1</sub> concentration (ppm) | Photocatalysis Degradation time/rate (%) | Reference   |
|----------------------------------------------------------------|-----------------------------|-----------------------------|--------------------------------------|------------------------------------------|-------------|
| Nanosized g-C <sub>3</sub> N <sub>4</sub> sheets               | 500 W Xenon lamp (λ>400 nm) | 10 mg                       | 100 mL<br>0.5 ppm                    | 120 min<br>70.2%                         | 2           |
| WO <sub>3</sub> /RGO/g-C <sub>3</sub> N <sub>4</sub> composite | 300 W Xenon lamp (λ>420 nm) | 10 mg                       | 100 mL<br>0.54 ppm                   | 120 min<br>92%                           | 3           |
| Clew-like WO <sub>3</sub> Decorated with CdS                   | 300 W Xenon lamp (λ>420 nm) | 10 mg                       | 100 mL<br>0.46 ppm                   | 80 min<br>95.5%                          | 4           |
| T-10%U                                                         | 300 W Xenon lamp (λ>420 nm) | 10 mg                       | 100 mL<br>0.5 ppm                    | 80 min<br>98.8%                          | This report |

## References

1. Y. Han, X. He, W. Yang, X. Luo, Y. Yu, W. Tang, T. Yue and Z. Li, *Food Chem.*, 2021, **345**, 128839.
2. J. Mao, L. Zhang, H. Wang, Q. Zhang, W. Zhang and P. Li, *Chemical Engineering Journal*, 2018, **342**, 30-40.
3. J. Mao, Q. Zhang, P. Li, L. Zhang and W. Zhang, *Chemical Engineering Journal*, 2018, **334**, 2568-2578.
4. J. Mao, P. Li, J. Wang, H. Wang, Q. Zhang, L. Zhang, H. Li, W. Zhang and T. Peng, *Applied Catalysis B: Environmental*, 2019, **248**, 477-486.
